# Supplementary material for: The Crystal Structure of Engineered Nitroreductase NTR 2.0 and Impact of F70A and F108Y Mutations on Substrate Specificity
Source: Preprints.org preprint supplement (doi:10.20944/preprints202303.0315.v1), 2023-03-17
Supplement: Supplementary file 1 [file supplementary]

## Sheet: Metronidazole
Average % growth vs unchallenged (IC50 assays raw data)
Drug Conc (µM)	NTR 2.0	NTR 2.0	NTR 2.0	WT	WT	WT
0	100	100	100	100	100	100
0.770735	100	91.8657	94.3918	96.5528	100	100
1.1561	100	90.8815	92.0428	95.0764	99.2594	100
1.73415	100	86.4827	90.7269	93.3278	98.6895	100
2.60123	97.5502	87.1771	88.7397	88.3543	95.5426	100
3.90184	97.8749	81.8516	84.7919	88.0071	94.7993	100
5.85277	93.0342	77.5677	78.1419	85.1794	93.5301	100
8.77915	84.3861	71.6936	69.1955	81.9919	85.835	96.9975
13.1687	65.3188	60.5206	55.3472	77.0559	79.1889	93.0243
19.7531	42.503	39.5369	30.4514	68.8824	68.6499	79.4529
29.6296	5.57851	9.9279	4.96337	52.3007	53.5213	65.1742
44.4444	0	0	0	31.1051	33.5664	37.1285
100	0.0295159	3.0675	3.31184	0.669464	0	0.515464
IC50	16.4583	15.2913	13.4231	29.5298	29.955	36.1505
STDEV
Drug Conc (µM)	NTR 2.0	NTR 2.0	NTR 2.0	WT	WT	WT
0	0	0	0	0	0	0
0.770735	13.0652	5.61106	2.23636	6.90998	6.86432	29.9465
1.1561	16.5298	6.02079	1.08561	1.87587	8.84224	30.2498
1.73415	15.2358	3.40292	0.173698	3.33134	4.08044	23.9338
2.60123	13.9835	4.38501	0.210919	1.20819	8.53076	0
3.90184	13.5244	4.05973	2.52483	1.69923	8.46846	0
5.85277	12.1886	5.20759	0.409431	1.62858	4.69562	25.2375
8.77915	4.54986	2.19876	1.04529	1.04921	6.66964	24.6575
13.1687	6.97089	1.81718	5.25127	1.92533	7.16023	20.0708
19.7531	0.500902	0.0656814	1.30274	1.77695	3.1343	17.3943
29.6296	1.46096	1.27297	0.375312	0.307346	4.48536	23.008
44.4444	2.25406	1.96419	3.42123	0.777196	0	10.1844
100	4.63334	2.53655	0.0620351	2.98161	2.5347	0.728976

## Sheet: RB6145
Average % growth vs unchallenged (IC50 assays raw data)
Drug Conc (µM)	NTR 2.0	NTR 2.0	NTR 2.0	WT	WT	WT
0	100	100	100	100	100	100
3.85367	95.2845	88.7833	100	100	100	100
5.78051	93.8033	93.0479	100	100	100	100
8.67076	90.1481	84.9734	100	100	100	100
13.0061	82.1238	78.4011	98.0873	95.3782	100	100
19.5092	78.4687	66.3425	88.7803	89.4958	97.6689	95.1202
29.2638	57.2943	59.9806	70.8489	83.6134	89.3468	81.8293
43.8957	43.052	33.6938	50.7519	74.3697	79.3919	79.9945
65.8436	1.09228	7.97049	10.6687	63.0252	63.5811	60.5584
98.7654	0	0	0	43.6975	49.8086	47.1291
148.148	0	0	0	37.8151	37.9842	28.82
500	12.3988	14.7508	10.5371	7.98319	6.03604	8.46647
IC50	34.0215	31.4748	40.4169	86.7093	96.6769	84.9607
STDEV
Drug Conc (µM)	NTR 2.0	NTR 2.0	NTR 2.0	WT	WT	WT
0	0	0	0	0	0	0
3.85367	5.62882	12.5993	16.2835	4.75366	3.47183	2.33764
5.78051	1.48444	14.1832	18.6455	0.594207	3.71072	3.55679
8.67076	0.414438	12.548	14.2646	1.18841	6.56144	5.79935
13.0061	1.36388	7.70052	10.3493	5.34787	6.32255	4.42361
19.5092	0.293874	8.43602	14.593	2.97104	9.66698	0.41384
29.2638	0.956975	6.55451	5.55199	2.97104	6.14737	2.34323
43.8957	2.6524	3.04805	9.76621	6.53628	6.21107	0.251659
65.8436	0.504861	5.04588	5.29718	1.18841	2.00665	5.17859
98.7654	4.18206	3.55777	0.436123	3.01458e-14	0.907772	0.816495
148.148	0.565143	1.58047	7.20827	2.37683	4.02923	3.13176
500	1.93656	3.072	2.93525	2.97104	0.891846	1.00104

## Sheet: Nitrofurantoin
Average % growth vs unchallenged (IC50 assays raw data)
Drug Conc (µM)	NTR 2.0	NTR 2.0	NTR 2.0	WT	WT	WT
0	100	100	100	100	100	100
3.46831	95.7402	97.4537	93.7203	94.1065	96.8901	91.7693
5.20246	92.3054	93.3565	90.5658	93.0495	93.7712	94.5918
7.80369	94.7506	89.2824	86.7727	90.0973	91.4305	89.8609
11.7055	75.4884	86.4583	81.5347	82.7061	85.235	81.1623
17.5583	68.5269	76.5278	71.7703	77.5858	80.1569	75.3724
26.3374	65.7227	64.5139	62.3434	61.3923	65.3706	55.7067
39.5062	36.5066	25.7407	32.7343	18.013	33.8572	23.1439
59.2593	3.63998	0	1.06362	0	0	0
88.8889	3.3557	3.7963	1.01263	0	0	0
133.333	9.82773	18.3102	15.3254	11.0354		1.27432
IC50	29.7379	29.7004	29.7903	28.5193	31.4338	27.3534
STDEV
Drug Conc (µM)	NTR 2.0	NTR 2.0	NTR 2.0	WT	WT	WT
0	0	0	0	0	0	0
3.46831	0.619659	1.63682	1.07835	2.14101	1.08344	0.235064
5.20246	8.03441	8.41326	3.58876	6.68683	1.13483	4.2268
7.80369	1.11841	1.53861	1.77549	4.57641	3.34882	2.93394
11.7055	17.5802	3.43732	0.21979	2.77949	7.62264	0.73131
17.5583	12.239	8.05316	0.910069	2.36658	0.441085	4.03526
26.3374	1.9678	0.0982093	3.51321	0.921399	0.35972	1.05343
39.5062	5.1205	2.88081	2.47264	0.332621	1.83714	0.34389
59.2593	2.44539	1.0803	2.47951	4.53818	0.0513886	2.34193
88.8889	#DIV/0!	6.41634	4.41985	3.75059	6.51778	3.46066
133.333	1.28768	1.34219	0.758964	1.15462		5.04081

## Sheet: Nitrofurazone
Average % growth vs unchallenged (IC50 assays raw data)
Drug Conc (µM)	NTR 2.0	NTR 2.0	NTR 2.0	WT	WT	WT
0	100	100	100	100	100	100
1.54147	100	97.3308	100	100	94.6473	100
2.3122	100	100	100	100	92.1471	100
3.46831	100	100	100	100	100	100
5.20246	100	100	100	100	100	100
7.80369	100	100	100	100	100	100
11.7055	100	100	100	100	100	100
17.5583	100	100	100	100	100	100
26.3374	100	100	100	100	100	91.1238
39.5062	92.4253	100	100	100	83.3361	66.581
59.2593	66.977	65.9359	82.9135	71.9095	43.6101	40.2681
88.8889	36.2299		30.1128	63.3787	19.3034	5.62895
133.333	0.195402	0	0	14.5522	0	13.5811
200	0	10.7413	8.81579	9.82967	9.19314	10.49
IC50	73.2427	60.7402	76.8416	92.7433	57.1109	49.5765
STDEV
Drug Conc (µM)	NTR 2.0	NTR 2.0	NTR 2.0	WT	WT	WT
0	0	0	0	0	0	0
1.54147	#DIV/0!	5.78074	#DIV/0!	3.88719	5.37722	1.44026
2.3122	#DIV/0!	1.57564	#DIV/0!	18.3242	7.81685	0.138044
3.46831	22.6924	24.1903	16.6144	30.2194	0.43234	2.47099
5.20246	18.2385	20.0801	5.36976	7.54881	1.60969	8.91303
7.80369	21.6033	15.3972	10.0749	4.01207	10.9204	2.2041
11.7055	16.7592	2.57524	1.22282	7.62132	13.2906	6.00951
17.5583	19.0675	16.1393	3.34945	13.4622	17.2318	1.47707
26.3374	17.4907	11.1006	27.221	1.11178	8.21831	0.303697
39.5062	18.5148	0.31174	6.37991	22.872	12.6112	2.84831
59.2593	16.4666	8.9964	7.15082	20.729	12.8737	3.18421
88.8889	24.8381	#DIV/0!	4.20011	2.1873	3.39695	0.947901
133.333	16.3041	0	6.56599	20.58	5.72464	7.51879
200	2.84468	0.857284	1.35573	2.29203	0.941883	0.358914

## Sheet: Azomycin
Average % growth vs unchallenged (IC50 assays raw data)
Drug Conc (µM)	NTR 2.0	NTR 2.0	NTR 2.0	WT	WT	WT
0	100	100	100	100	100	100
1.92684	99.8673		88.7388
2.89025	100	97.0751	93.3084	100	96.2992	96.2546
4.33538	100	97.14	88.6864	100	90.1542	94.0177
6.50307	100	100	92.9697	98.7639	90.843	99.1027
9.75461	100	93.6914	89.39	100	87.5125	91.408
14.6319	99.5077	91.8463	89.637	99.375	87.6755	96.0725
21.9479	98.4974	94.1988	85.0019	95.3333	84.8093	95.1491
32.9218	95.8305	95.2604	91.6673	94.2639	83.9402	77.1415
49.3827	99.5676	92.6785	82.9847	83.6528	74.5165	69.2995
74.0741	72.6413	75.0457	69.5996	68.0833	57.3977	62.2811
111.111		12.7147		25.8611	27.1449	21.4019
166.667	12.8168	12.1747	9.84281	16.0278	18.0915	13.7073
250	0	0	0	10.8333	2.76264	7.48656
IC50	98.0642	85.7965	94.4883	87.2141	80.7721	75.9961
STDEV
Drug Conc (µM)	NTR 2.0	NTR 2.0	NTR 2.0	WT	WT	WT
0	0	0	0	0	0	0
1.92684	5.99951	0	3.55141	0	0	0
2.89025	4.27412	3.25809	2.39231	6.79608	0.729843	7.23414
4.33538	6.71388	0.347339	0.0899762	7.24784	3.11472	2.19477
6.50307	1.68301	1.84865	0.219648	8.62277	6.64456	3.20632
9.75461	2.54873	3.37579	6.16601	7.8371	10.4539	1.41004
14.6319	5.11563	10.6527	2.28116	3.83016	3.01705	0.711153
21.9479	4.06223	3.81211	0.88653	6.59966	1.03643	2.98562
32.9218	7.66436	2.08116	5.00956	3.20162	1.99418	17.7972
49.3827	3.2631	0.186587	7.26954	1.43386	10.8174	15.6699
74.0741	2.85143	6.30377	8.27251	3.88909	6.20231	3.94199
111.111	3.95326	1.34343	2.40819	0.74639	5.06007	0.729545
166.667	2.21576	4.04176	3.75783	2.86771	6.84262	3.88682
250	0.611454	2.35674	1.32583	3.53553	1.20465	2.83848

## Sheet: CB1954
Average % growth vs unchallenged (IC50 assays raw data)
Drug Conc (µM)	NTR 2.0	NTR 2.0	NTR 2.0	WT	WT	WT
0	100	100	100	100	100	100
7.70735	100	100	100	100	100	100
11.561	100	100	100	100	100	100
17.3415	100	100	100	100	100	98.4648
26.0123	100	100	100	99.3519	100	99.6276
39.0184	100	100	99.3077	99.4213	100	100
58.5277	95.1831	99.2404	93.1282	94.3519	100	96.2988
87.7915	90.1087	98.5741	87.5385	83.5648	94.964	88.9117
131.687	79.4051	82.9291	81.7692	74.2593	88.846	86.9965
197.531	67.8355	68.69	67.3846	67.3611	76.1324	69.5014
296.296	47.3029	46.7884	41.8718	46.6204	48.1813	41.7617
444.444	0	0	0	0	0	4.26357
666.667	0	0	0	0	0	0
1000	0	0	0	0	0	0
IC50	249.913	255.036	259.136	239.294	272.803	253.19
STDEV
Drug Conc (µM)	NTR 2.0	NTR 2.0	NTR 2.0	WT	WT	WT
0	0	0	0	0	0	0
7.70735	22.4976	15.6423	14.7223	8.446	13.3526	13.1017
11.561	19.2796	14.0592	14.7948	7.4639	8.54633	10.189
17.3415	19.2036	15.0298	14.7586	5.36877	9.90153	9.84511
26.0123	17.1183	18.7236	11.6038	3.01175	7.75274	11.4895
39.0184	16.0897	19.4775	7.50621	6.05624	12.8398	10.1031
58.5277	12.8558	13.7011	5.36676	3.79743	7.74867	15.1009
87.7915	10.3623	9.59268	7.83257	2.29155	7.12194	10.1998
131.687	15.8296	6.46422	13.8158	2.88081	5.59174	1.94538
197.531	11.643	12.7117	4.78657	0.982093	9.99513	5.85763
296.296	3.20994	7.0673	1.70431	1.11304	2.00635	4.52488
444.444	3.82231	0.838653	#DIV/0!	1.11304	2.14879	6.02959
666.667	1.93317	5.45595	#DIV/0!	#DIV/0!	#DIV/0!	3.28887
1000	3.94638	0.998845	3.11852	3.30638	1.01335	4.61087

## Sheet: 2,4-DNT
Average % growth vs unchallenged (IC50 assays raw data)
Drug Conc (µM)	NTR 2.0	NTR 2.0	NTR 2.0	WT	WT	WT
0	100	100	100	100	100	100
17.3415	97.4724	93.8077	89.6102	87.7669	89.9376	93.5513
26.0123	94.3038	90.8718	88.0765	94.9546	90.0008	93.9487
39.0184	93.0217	89.2051	89.0301	99.6502	87.0587	94.1667
58.5277	89.1878	83.3333	83.4481	92.667	89.3639	87.8846
87.7915	89.5326	84.3333	84.6417	93.5461	86.0653	88.9103
131.687	85.0657	89.9615	84.9151	87.0945	85.7595	82.9615
197.531	83.4956	81.6923	81.2341	88.0032	81.2629	78.8077
296.296	74.2738	79.4487	73.1313	84.2481	73.4045	75.1795
444.444	48.7423	63.3974	50.3172	80.0545	70.5635	71.5513
666.667	6.65368	8.52564	21.0404	58.9618	56.8081	50.6923
1000	0	0	0	25.2567	21.0297	19.0128
IC50	419.299	483.949	442.314	731.866	667.011	624.177
STDEV
Drug Conc (µM)	NTR 2.0	NTR 2.0	NTR 2.0	WT	WT	WT
0	0	0	0	0	0	0
17.3415	4.4811	1.21477	6.997	3.61424	0.181944	6.29144
26.0123	8.05565	1.59552	9.16604	0.163846	4.77529	11.3862
39.0184	6.24255	0.7615	8.77944	10.454	3.31675	3.53553
58.5277	3.5057	#DIV/0!	6.09102	2.40307	5.67606	1.72244
87.7915	9.36383	1.41421	3.44095	1.828	1.91191	1.54113
131.687	7.52205	6.65406	2.09231	7.29595	3.28096	3.24544
197.531	12.4622	0.507666	7.29801	4.01904	6.83036	3.5718
296.296	15.5318	2.66525	6.25037	2.35809	2.02227	1.16038
444.444	3.59176	0.0906547	8.69091	8.28867	7.91308	1.25104
666.667	7.59664	2.08506	1.99197	1.269	0.73076	2.79217
1000	2.79997	0.145048	1.7736	0.134932	5.38972	4.22451

## Sheet: 2,6-DNT
Average % growth vs unchallenged (IC50 assays raw data)
Drug Conc (µM)	NTR 2.0	NTR 2.0	NTR 2.0	WT	WT	WT			Drug Conc (µM)	NTR 2.0	NTR 2.0	NTR 2.0	WT	WT	WT
0	100	100	100	100	100	100			0	100	100	100	100	100	100
17.3415	89.8334	94.7783	100	100	84.4551	92.9487			26.0123	89.4124	94.224	100	100	100	100
26.0123	93.6575	99.961	100	100	90.1442	88.3832			39.0184	87.5805	88.5071	100	100	100	100
39.0184	95.1556	98.8499	100	100	91.8002	95.2422			58.5277	86.4293	90.4951	100	100	100	100
58.5277	93.3723	94.2861	100	100	87.1528	95.2707			87.7915	84.6097	87.2233	100	96.8636	98.9244	100
87.7915	90.5412	88.482	100	100	88.1677	91.567			131.687	80.7476	85.7952	98.3811	100	95.7383	96.398
131.687	94.4203	95.6408	100	100	86.7254	88.9245			197.531	83.9908	88.5902	89.6819	100	97.0665	96.8254
197.531	90.8814	92.5171	100	99.6663	83.9476	64.4801			296.296	79.9101	85.5043	88.4693	95.1092	84.6887	88.6447
296.296	100	95.8041	100	98.9989	83.2799	90.9972			444.444	79.6088	80.7628	81.7953	86.2132	89.0075	84.0049
444.444	95.4132	91.1964	100	90.724	73.3974	75.7479			666.667	55.0545	61.4623	51.9024	81.0493	68.4322	76.5873
666.667	77.1859	75.2364	89.1454	89.1516	65.7585	70.0499			1000	8.91236	8.03517	0	46.8636	50.1141	47.8022
1000	0	0	0	51.5385	46.4744	52.2578			1500	0	0	0	2.66468	3.64244	0.457875
IC50	700.66	718.572	689.839	1019.18	939.923	1241.95			IC50	689.896	715.812	653.138	940.595	903.747	928.727
STDEV									STDEV
Drug Conc (µM)	NTR 2.0	NTR 2.0	NTR 2.0	WT	WT	WT			Drug Conc (µM)	NTR 2.0	NTR 2.0	NTR 2.0	WT	WT	WT
0	0	0	0	0	0	0			0	0	0	0	0	0	0
17.3415	2.9392	8.43221	2.36939	4.84736	4.3061	9.97202			26.0123	7.30564	11.1562	0.142535	7.18576	#DIV/0!	#DIV/0!
26.0123	0.650799	7.38809	1.92414	6.62313	5.09933	8.04812			39.0184	8.84613	1.3145	0.672587	1.36927	#DIV/0!	#DIV/0!
39.0184	3.73148	5.81675	3.16449	3.43155	4.7216	7.77616			58.5277	4.66231	1.49079	1.59906	4.95045	23.0709	5.78463
58.5277	3.13374	13.3186	1.10784	6.1032	5.40151	15.0688			87.7915	14.0161	2.13413	1.17591	1.76718	3.91813	6.08682
87.7915	2.97811	0.472094	4.18751	2.76764	5.93033	9.831			131.687	13.666	7.14159	5.63013	15.6823	15.5457	3.8852
131.687	2.69162	4.06965	1.12904	1.18384	2.0775	5.18746			197.531	0.361781	3.18882	0.11581	3.42903	15.0272	4.48957
197.531	2.49709	12.6776	0.662581	2.64765	9.93425	29.3822			296.296	2.25821	0.581472	4.05779	4.24826	20.2936	6.389
296.296	4.01944e-14	0.351486	1.93474	7.94295	1.88864	5.39899			444.444	2.68418	5.2951	8.77481	5.8516	6.027	2.07211
444.444	0.247586	2.21574	7.94568	7.67899	2.26637	2.87073			666.667	5.44422	1.71658	14.5697	5.45369	9.28827	1.68359
666.667	7.25074	0.596148	10.4741	3.37555	3.24846	5.6911			1000	15.5099	2.57951	21.6341	1.76718	2.55831	2.5038
1000	10.1899	0.747769	0.73679	2.17571	4.98601	0.473419			1500	2.11817	4.29918	21.4203	2.43426	9.23065	1.76993
